# Supplementary material for: EARLY PREDICTION OF UNEXPECTED LATENT SHOCK IN THE EMERGENCY DEPARTMENT USING VITAL SIGNS
Source: PubMed Central journal article supplement — Shock. 2023 Jul 29;60(3):373–8. doi: 10.1097/SHK.0000000000002181 (PMC10510834; doi:10.1097/shk.0000000000002181), 2023-07-29
Supplement: shock-60-373-s003.pdf [file shock-60-373-s003.pdf]

TABLE S1. AUROC for prediction of shock by each machine-learning method, shock index, and adjusted shock index

| <b>Time Before Shock (hour)</b> | <b>RNN</b> | <b>MLP</b> | <b>RF</b> | <b>LR</b> | <b>Shock Index</b> | <b>Adjusted Shock Index</b> |
|---------------------------------|------------|------------|-----------|-----------|--------------------|-----------------------------|
| <b>24</b>                       | 0.610      | 0.621      | 0.528     | 0.594     | 0.637              | 0.685                       |
| <b>23</b>                       | 0.600      | 0.614      | 0.552     | 0.603     | 0.602              | 0.622                       |
| <b>22</b>                       | 0.675      | 0.685      | 0.577     | 0.632     | 0.602              | 0.632                       |
| <b>21</b>                       | 0.706      | 0.701      | 0.594     | 0.659     | 0.584              | 0.620                       |
| <b>20</b>                       | 0.708      | 0.713      | 0.608     | 0.686     | 0.567              | 0.625                       |
| <b>19</b>                       | 0.671      | 0.685      | 0.618     | 0.672     | 0.564              | 0.590                       |
| <b>18</b>                       | 0.622      | 0.698      | 0.624     | 0.698     | 0.576              | 0.556                       |
| <b>17</b>                       | 0.687      | 0.689      | 0.629     | 0.690     | 0.564              | 0.610                       |
| <b>16</b>                       | 0.687      | 0.691      | 0.638     | 0.708     | 0.559              | 0.610                       |
| <b>15</b>                       | 0.704      | 0.716      | 0.654     | 0.720     | 0.572              | 0.605                       |
| <b>14</b>                       | 0.687      | 0.713      | 0.657     | 0.724     | 0.542              | 0.673                       |
| <b>13</b>                       | 0.713      | 0.704      | 0.666     | 0.723     | 0.562              | 0.573                       |
| <b>12</b>                       | 0.715      | 0.740      | 0.679     | 0.735     | 0.554              | 0.568                       |
| <b>11</b>                       | 0.727      | 0.743      | 0.682     | 0.743     | 0.559              | 0.586                       |
| <b>10</b>                       | 0.731      | 0.728      | 0.703     | 0.752     | 0.580              | 0.597                       |
| <b>9</b>                        | 0.741      | 0.747      | 0.713     | 0.757     | 0.538              | 0.617                       |
| <b>8</b>                        | 0.763      | 0.765      | 0.732     | 0.771     | 0.579              | 0.619                       |
| <b>7</b>                        | 0.775      | 0.778      | 0.764     | 0.785     | 0.562              | 0.612                       |
| <b>6</b>                        | 0.779      | 0.790      | 0.782     | 0.788     | 0.580              | 0.660                       |
| <b>5</b>                        | 0.783      | 0.802      | 0.807     | 0.802     | 0.565              | 0.609                       |
| <b>4</b>                        | 0.797      | 0.819      | 0.826     | 0.812     | 0.531              | 0.557                       |
| <b>3</b>                        | 0.822      | 0.841      | 0.852     | 0.830     | 0.546              | 0.732                       |
| <b>2</b>                        | 0.853      | 0.864      | 0.877     | 0.854     | 0.518              | 0.658                       |
| <b>1</b>                        | 0.881      | 0.899      | 0.903     | 0.878     | 0.544              | 0.493                       |

RNN, Recurrent Neural Network; MLP, Multi-layer perceptron; RF, Random forest; LR, Logistic regression; SI, Shock index; ASI, Adjusted shock index.

**FIG. S1. Interval of bolus hydration and hypotensive shock event. The number is the time between hypotensive shock event and hydration.**

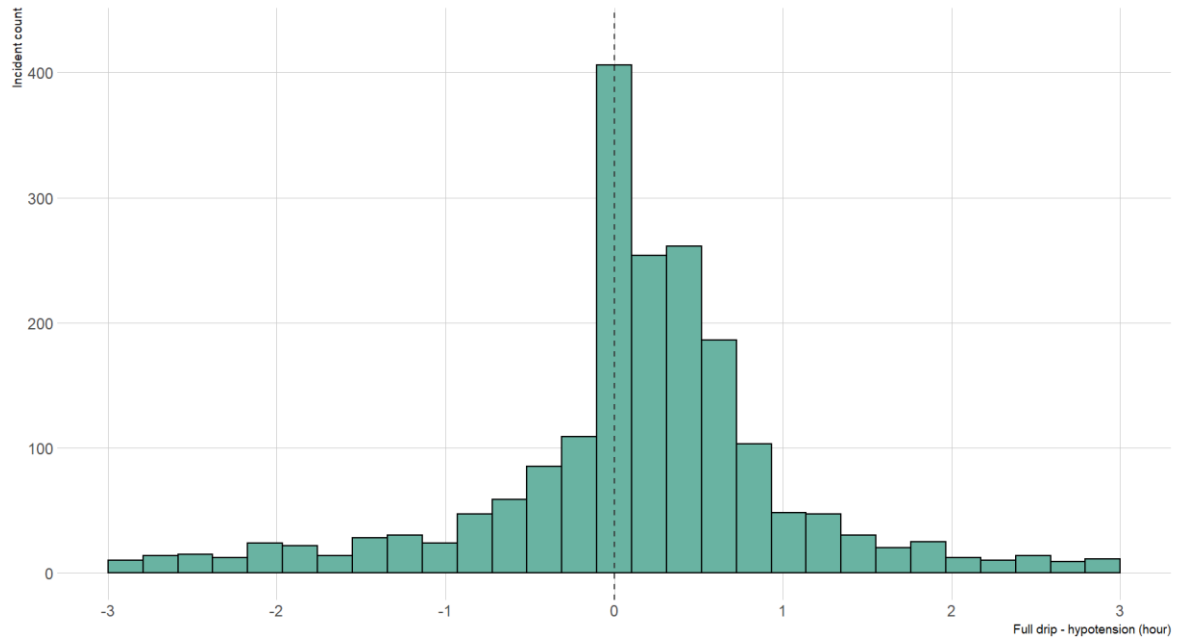

TABLE S2. Random forest model sensitivity analysis

| <b>Time Before Shock (hour)</b> | <b>AUROC</b> | <b>Accuracy</b> | <b>Sensitivity</b> | <b>Specificity</b> |
|---------------------------------|--------------|-----------------|--------------------|--------------------|
| 1                               | 0.903        | 0.85            | 0.819              | 0.851              |
| 2                               | 0.877        | 0.799           | 0.804              | 0.799              |
| 3                               | 0.852        | 0.796           | 0.778              | 0.796              |
| 4                               | 0.826        | 0.73            | 0.794              | 0.727              |
| 5                               | 0.807        | 0.753           | 0.735              | 0.754              |
| 6                               | 0.782        | 0.661           | 0.818              | 0.654              |
| 7                               | 0.764        | 0.626           | 0.822              | 0.618              |
| 8                               | 0.732        | 0.599           | 0.804              | 0.59               |
| 9                               | 0.713        | 0.596           | 0.785              | 0.588              |
| 10                              | 0.703        | 0.508           | 0.855              | 0.493              |
| 11                              | 0.682        | 0.461           | 0.877              | 0.444              |
| 12                              | 0.679        | 0.474           | 0.864              | 0.457              |
| 13                              | 0.666        | 0.431           | 0.89               | 0.412              |
| 14                              | 0.657        | 0.413           | 0.9                | 0.392              |
| 15                              | 0.654        | 0.386           | 0.916              | 0.363              |
| 16                              | 0.638        | 0.386           | 0.894              | 0.364              |
| 17                              | 0.629        | 0.359           | 0.916              | 0.335              |
| 18                              | 0.624        | 0.329           | 0.942              | 0.303              |
| 19                              | 0.618        | 0.313           | 0.941              | 0.287              |
| 20                              | 0.608        | 0.298           | 0.944              | 0.27               |
| 21                              | 0.594        | 0.266           | 0.953              | 0.237              |
| 22                              | 0.577        | 0.226           | 0.963              | 0.194              |
| 23                              | 0.552        | 0.187           | 0.947              | 0.155              |
| 24                              | 0.528        | 0.125           | 0.966              | 0.09               |

TABLE S3. Variation in vital signs

|                               | SMC                 |                         |         | MIMIC               |                         |         |
|-------------------------------|---------------------|-------------------------|---------|---------------------|-------------------------|---------|
|                               | <i>Latent shock</i> | <i>Non-Latent Shock</i> |         | <i>Latent shock</i> | <i>Non-Latent Shock</i> |         |
|                               | Median [IQR]        | Median [IQR]            | p-value | Median [IQR]        | Median [IQR]            | p-value |
| <b><i>SBP</i></b>             | 105 [94,108]        | 122 [108, 125]          | <0.001  | 110 [99, 125]       | 129 [115, 146]          | <0.001  |
| <b><i>DBP</i></b>             | 62 [55, 63]         | 74 [65, 75]             | <0.001  | 60 [53, 70]         | 73 [63, 83]             | <0.001  |
| <b><i>SPO<sub>2</sub></i></b> | 97 [95, 98]         | 98 [96, 98]             | <0.001  | 98 [96, 100]        | 98 [96, 100]            | <0.001  |
| <b><i>RR</i></b>              | 20 [18, 20]         | 18 [17, 18]             | <0.001  | 18 [16, 21]         | 18 [16, 19]             | <0.001  |
| <b><i>PR</i></b>              | 103 [86, 106]       | 85 [73, 88]             | <0.001  | 87 [72, 105]        | 81 [70, 95]             | <0.001  |
| <b><i>BT</i></b>              | 37.5 [36.8, 37.7]   | 37.1 [36.7, 37.2]       | <0.001  | 36.8 [36.5, 37.4]   | 36.7 [36.5, 37]         | <0.001  |

TABLE S4. Variation of repeated measures in vital signs

|                               | SMC                 |                         |         | MIMIC               |                         |         |
|-------------------------------|---------------------|-------------------------|---------|---------------------|-------------------------|---------|
|                               | <i>Latent shock</i> | <i>Non-Latent Shock</i> |         | <i>Latent shock</i> | <i>Non-Latent Shock</i> |         |
|                               | Median [IQR]        | Median [IQR]            | p-value | Median [IQR]        | Median [IQR]            | p-value |
| <b><i>SBP</i></b>             | 5 [3, 6]            | 5 [3, 5]                | <0.001  | 4 [2, 5]            | 4 [3, 5]                | <0.001  |
| <b><i>DBP</i></b>             | 5 [3, 6]            | 5 [3, 5]                | <0.001  | 4 [2, 5]            | 4 [3, 5]                | <0.001  |
| <b><i>SPO<sub>2</sub></i></b> | 5 [3, 5]            | 4 [3, 5]                | <0.001  | 3 [2, 5]            | 4 [2, 5]                | <0.001  |
| <b><i>RR</i></b>              | 5 [4, 6]            | 5 [3, 5]                | <0.001  | 4 [2, 5]            | 4 [3, 5]                | <0.001  |
| <b><i>PR</i></b>              | 6 [4, 6]            | 5 [3, 5]                | <0.001  | 4 [2, 5]            | 4 [3, 6]                | <0.001  |
| <b><i>BT</i></b>              | 3 [2, 4]            | 4 [3, 5]                | <0.001  | 2 [2, 3]            | 3 [2, 4]                | <0.001  |

TABLE S4. Proportion of vital sign information provided without missing

| Length of stay | Patient n | DBP  | SBP  | BT   | PR   | RR   | SpO2 |
|----------------|-----------|------|------|------|------|------|------|
| 24             | 19725     | 38   | 38   | 37.3 | 38.7 | 38.4 | 37   |
| 23             | 22496     | 32.5 | 32.5 | 31.2 | 33.4 | 33.1 | 31.6 |
| 22             | 25003     | 32.8 | 32.8 | 31.6 | 33.9 | 33.5 | 32.3 |
| 21             | 27282     | 32.9 | 32.9 | 31.8 | 33.8 | 33.5 | 32   |
| 20             | 29450     | 31   | 31   | 29.8 | 31.9 | 31.5 | 30.1 |
| 19             | 31531     | 30.3 | 30.3 | 29.2 | 31.4 | 31   | 29.6 |
| 18             | 33541     | 30.7 | 30.7 | 29.6 | 31.8 | 31.4 | 29.9 |
| 17             | 35581     | 31.1 | 31.2 | 30.2 | 32.2 | 31.9 | 30.4 |
| 16             | 37628     | 29.8 | 29.8 | 28.8 | 31   | 30.6 | 29.1 |
| 15             | 39900     | 29.7 | 29.7 | 28.7 | 30.8 | 30.4 | 29.1 |
| 14             | 42392     | 30.3 | 30.3 | 29.2 | 31.3 | 31   | 29.6 |
| 13             | 45206     | 30.8 | 30.8 | 29.7 | 31.9 | 31.6 | 30.1 |
| 12             | 48472     | 30.6 | 30.6 | 29.4 | 31.6 | 31.2 | 29.9 |
| 11             | 52571     | 29.2 | 29.2 | 28.2 | 30.4 | 30   | 28.5 |
| 10             | 57383     | 30.6 | 30.6 | 29.5 | 31.7 | 31.3 | 29.9 |
| 9              | 62468     | 35.1 | 35.1 | 33.7 | 36   | 35.6 | 34.2 |
| 8              | 67780     | 32.7 | 32.7 | 31.2 | 33.8 | 33.4 | 31.8 |
| 7              | 73167     | 32.8 | 32.8 | 31.1 | 33.9 | 33.3 | 31.7 |
| 6              | 78214     | 34.5 | 34.5 | 32.6 | 35.6 | 35.1 | 33.4 |
| 5              | 82595     | 34.6 | 34.6 | 32.4 | 35.8 | 35.2 | 33.4 |
| 4              | 86149     | 35.4 | 35.4 | 33.2 | 36.6 | 35.9 | 33.9 |
| 3              | 88506     | 34.4 | 34.4 | 32   | 35.8 | 34.9 | 32.7 |
| 2              | 89161     | 33.1 | 33.1 | 30.4 | 34.5 | 33.4 | 31.5 |
| 1              | 89250     | 24   | 24   | 19.2 | 25.3 | 22.3 | 20.8 |

Patient n, number of patient.
